# Supplementary material for: Lasagna-type arrays with halide–nitromethane cluster filling. The first recognition of the Hal−⋯HCH2NO2 (Hal = Cl, Br, I) hydrogen bonding
Source: Royal Society of Chemistry journal article supplement (doi:10.1039/c2dt12394k), 2012-01-01
Supplement: c2dt12394k.pdf [file c2dt12394k.pdf]

## ELECTRONIC SUPPLEMENTARY INFORMATION

**Table 1S.** Total MP2 energies of the calculated structures (Hartree).

| Structure                       | Energy       |
|---------------------------------|--------------|
| <b>Ia</b>                       | -704.200075  |
| <b>Ib</b>                       | -704.200039  |
| <b>IIa</b>                      | -2817.087340 |
| <b>IIb</b>                      | -2817.087717 |
| <b>IIIa</b>                     | -539.359196  |
| <b>IIIb</b>                     | -539.359765  |
| Cl <sup>-</sup>                 | -459.724492  |
| Br <sup>-</sup>                 | -2572.613175 |
| I <sup>-</sup>                  | -294.887430  |
| CH <sub>3</sub> NO <sub>2</sub> | -244.450706  |

**Table 2S.** Cartesian coordinates (Å) of the calculated equilibrium structures.

| CH <sub>3</sub> NO <sub>2</sub> |           |           |           |
|---------------------------------|-----------|-----------|-----------|
| O                               | 2.104054  | -1.792136 | 0.123440  |
| O                               | 1.239624  | -0.633414 | 1.785122  |
| N                               | 1.181335  | -1.175524 | 0.673153  |
| C                               | -0.123848 | -1.112837 | -0.049182 |
| H                               | -0.703819 | -1.989014 | 0.268178  |
| H                               | -0.627287 | -0.188656 | 0.250515  |
| H                               | 0.085690  | -1.157156 | -1.122235 |
| <b>Ia</b>                       |           |           |           |
| Cl                              | -2.506640 | -3.417484 | 0.322978  |
| O                               | 2.117091  | -1.780509 | 0.128321  |
| O                               | 1.256375  | -0.627014 | 1.783102  |
| N                               | 1.178665  | -1.172087 | 0.669388  |
| C                               | -0.122784 | -1.120219 | -0.043422 |
| H                               | -0.746333 | -1.994892 | 0.250213  |
| H                               | -0.620219 | -0.192323 | 0.257430  |
| H                               | 0.092956  | -1.161693 | -1.116041 |
| <b>Ib</b>                       |           |           |           |
| Cl                              | -3.480322 | -0.904306 | 0.131718  |
| O                               | 1.616663  | -2.353689 | 0.311555  |
| O                               | 1.771149  | -0.167510 | 0.279286  |
| N                               | 1.110137  | -1.219129 | 0.312331  |
| C                               | -0.383265 | -1.114005 | 0.316663  |
| H                               | -0.792426 | -1.983011 | 0.835584  |
| H                               | -0.665329 | -0.171426 | 0.789599  |
| H                               | -0.724418 | -1.117345 | -0.724765 |
| <b>IIa</b>                      |           |           |           |
| Br                              | -2.690786 | -3.458552 | 0.258116  |
| O                               | 2.158262  | -1.728461 | 0.113048  |

|   |           |           |           |
|---|-----------|-----------|-----------|
| O | 1.299321  | -0.568245 | 1.764803  |
| N | 1.215031  | -1.136782 | 0.663617  |
| C | -0.103203 | -1.136999 | -0.021819 |
| H | -0.688235 | -2.024143 | 0.294258  |
| H | -0.628681 | -0.225042 | 0.278330  |
| H | 0.087404  | -1.187997 | -1.098384 |

**IIb**

|    |           |           |           |
|----|-----------|-----------|-----------|
| Br | -3.618142 | -0.894732 | 0.129770  |
| O  | 1.635156  | -2.355217 | 0.314535  |
| O  | 1.789493  | -0.168412 | 0.280609  |
| N  | 1.129755  | -1.220474 | 0.313660  |
| C  | -0.362776 | -1.115497 | 0.315994  |
| H  | -0.773123 | -1.984662 | 0.834352  |
| H  | -0.645994 | -0.173106 | 0.789342  |
| H  | -0.702179 | -1.118320 | -0.726290 |

**IIIa**

|   |           |           |           |
|---|-----------|-----------|-----------|
| I | -2.888316 | -3.532576 | 0.206643  |
| O | 2.199272  | -1.670726 | 0.092601  |
| O | 1.339987  | -0.513393 | 1.747201  |
| N | 1.251513  | -1.098607 | 0.655403  |
| C | -0.080713 | -1.147056 | -0.002602 |
| H | -0.628496 | -2.043980 | 0.339619  |
| H | -0.629801 | -0.248616 | 0.295374  |
| H | 0.085666  | -1.211270 | -1.082271 |

**IIIb**

|   |           |           |           |
|---|-----------|-----------|-----------|
| I | -3.817386 | -0.880893 | 0.126242  |
| O | 1.661904  | -2.357385 | 0.318682  |
| O | 1.816141  | -0.169748 | 0.283600  |
| N | 1.158102  | -1.222396 | 0.315799  |
| C | -0.334351 | -1.117549 | 0.314938  |
| H | -0.744876 | -1.987232 | 0.833021  |
| H | -0.617743 | -0.174977 | 0.788647  |
| H | -0.669603 | -1.120242 | -0.728957 |
